# Supplementary material for: Drilling-Induced Mineralization as a Formation Mechanism for Zebra Textures in Shale Cores
Source: Research Square preprint supplement (doi:10.21203/rs.3.rs-7401268/v1), 2025-09-19
Supplement: Supplementary file 1 [file 532849fb2157cb2a38305891.pdf]

# Supporting Information

Selected core photographs from Hole 392-U1581B, Subunit IIb

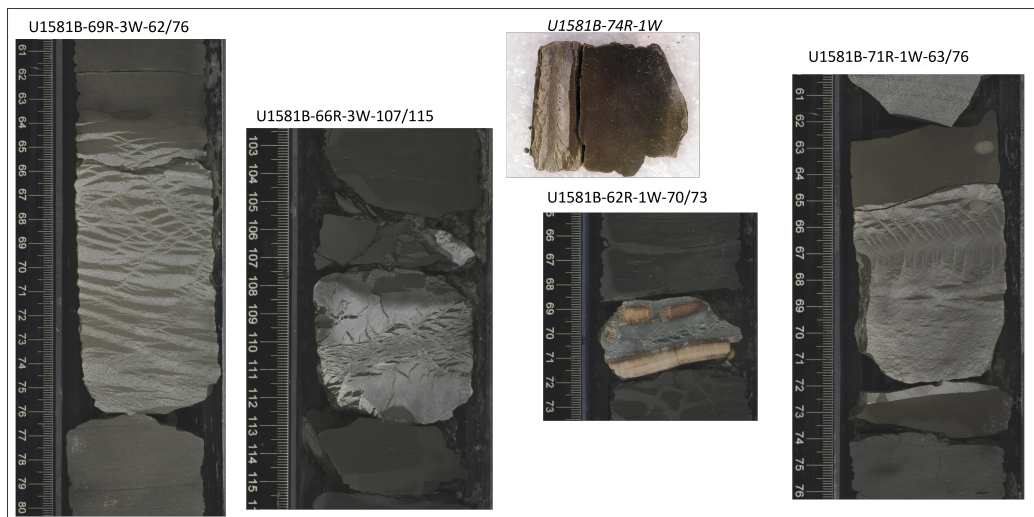

Figure 1: Claystone core sample images recovered in Hole 392-U1581B, Subunit IIb: Samples 62R-1W-70/73, 66R-3W-107/115, 69R-3W-62/76, 71R-1W-63/76, 74R-1W-64/71.

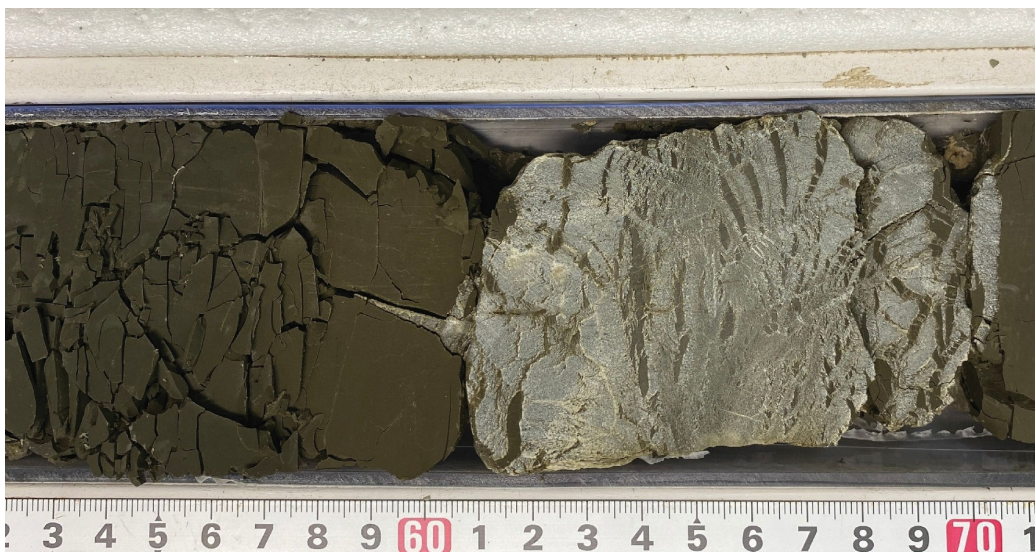

Figure 2: Core photograph of sample 64R-2A-50/75. Zebra-like textures formed by light calcite veins within the brown siderite-rich claystone (core distance of 60-70 cm). Note the upcore intrusion of calcite within the claystone at about 60 cm core distance.

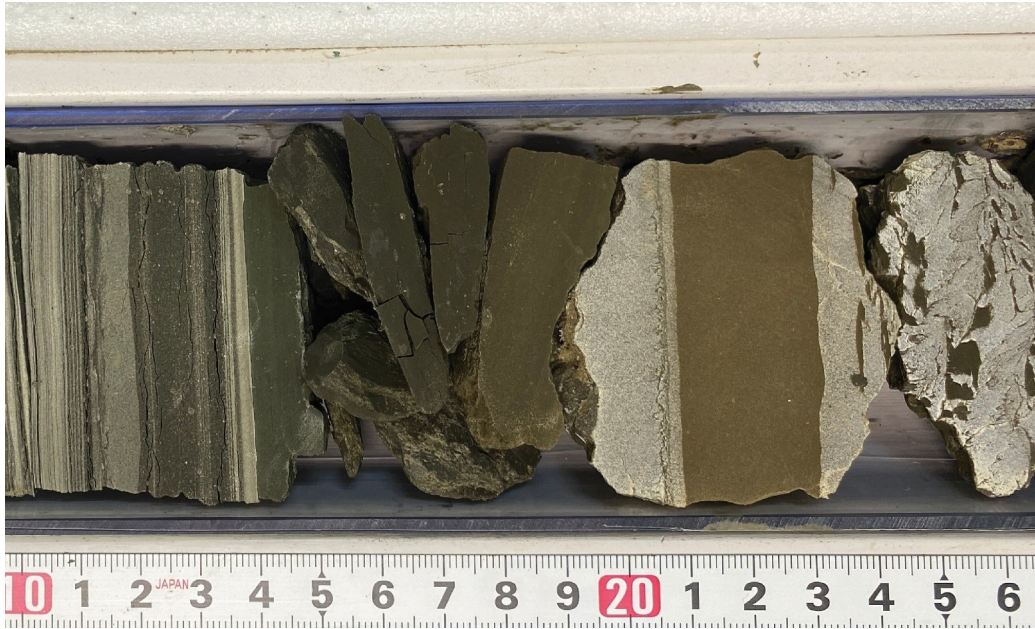

Figure 3: Core photograph of sample 70R-1A-50/76. The core sample shows core disturbances and incomplete recovery. Zebra-like textures formed by light calcite veins within the brown siderite-rich claystone (24-27 cm core distance). Note core biscuits/discs formed during drilling (15-19 cm core distance) and calcified layers within the brown claystone (20-24 cm core distance).



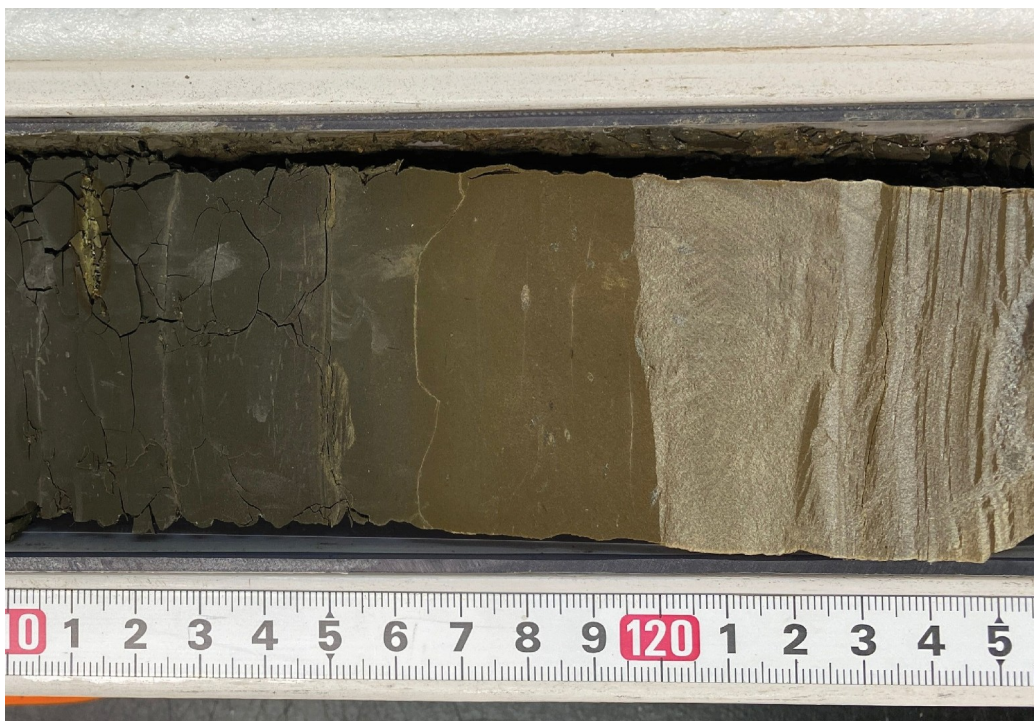

Figure 4: Core photograph of sample 71R-3A-100/125. The color change from dark gray to olive-brown corresponds to diagenetic alteration. The feather-like calcite veins are observed with the brown siderite-rich layer at 120-125 cm core distance. Note a centerline fracture (core distance of 110-115 cm), calcified induced tensile fracture at 116-117 cm core distance and mud-invasion halos at the core distances of 112.5 cm and 115 cm.



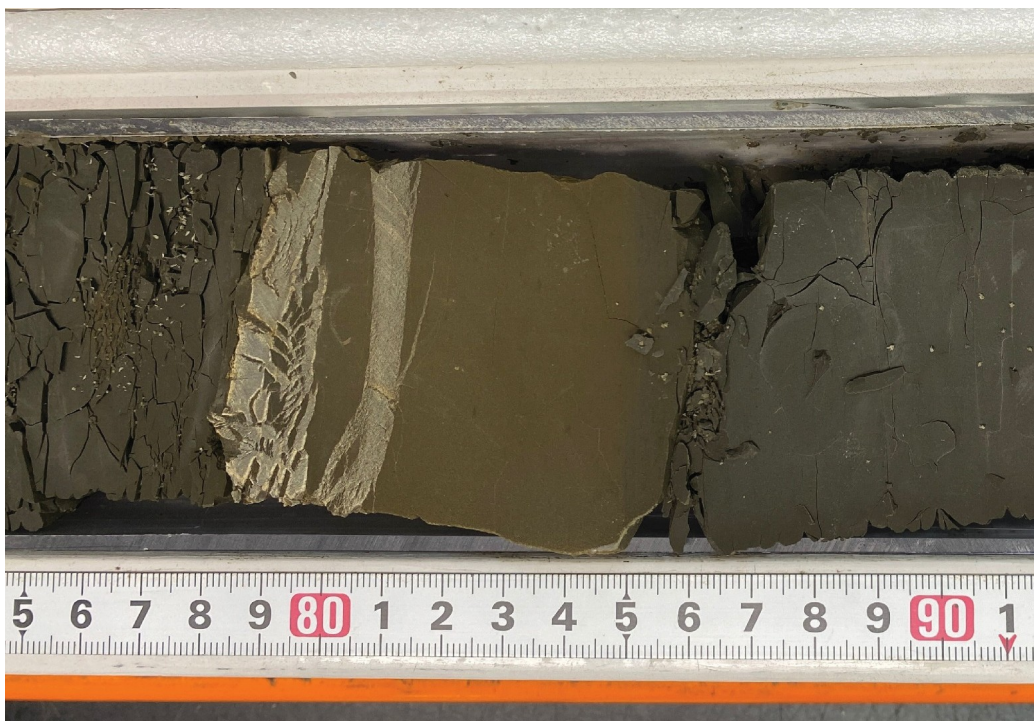

Figure 5: Core photograph of sample 72R-3A-75/100. Zebra-like textures formed by light calcite veins within the brown siderite-rich claystone (core distance of 78-82 cm).

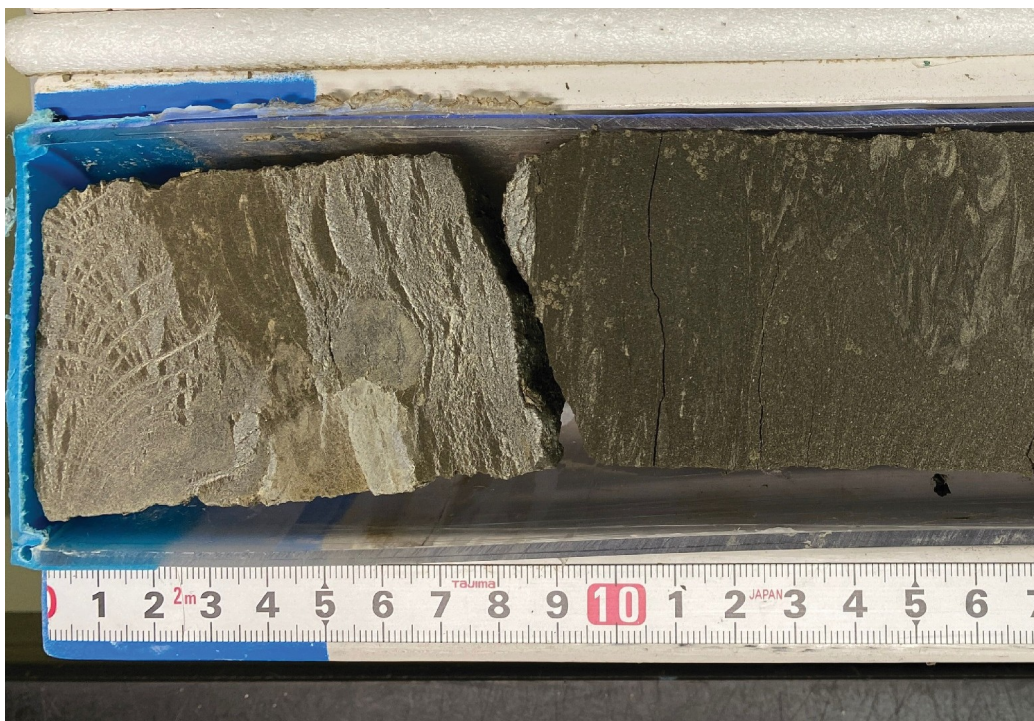

Figure 6: Core photograph of sample 72R-5A-0/26. Zebra-like textures formed by light calcite veins within the brown siderite-rich claystone (core distance of 0-9 cm). Note filled drilling-induced splay fractures at the top of the core.

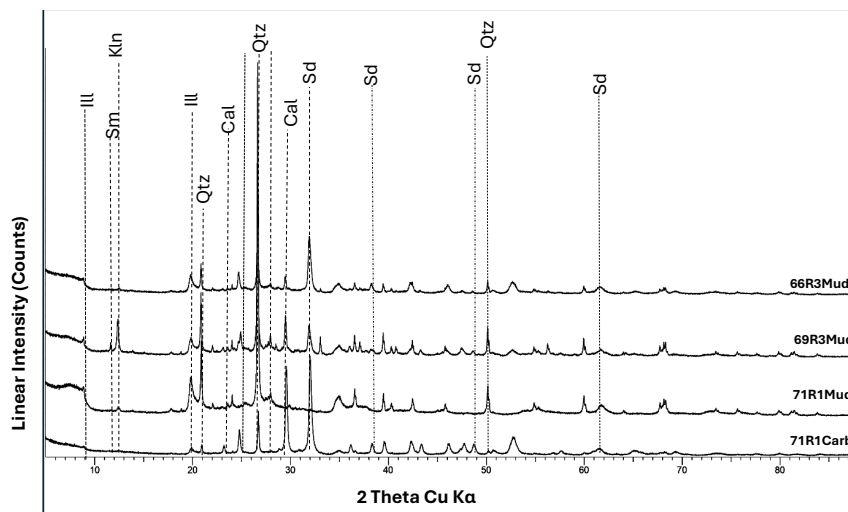

Figure 7: Whole-rock XRD patterns of samples U1581B-71R-1W-63/76(Carb), U1581B-71R-1W-63/76(Mud), U1581B-69R-3W-62/76(Mud) and U1581B-66R-3W-107/115(Mud). The identified phases are presented as IMA (the international mineralogical association) symbols: Qtz (quartz), Sd (siderite), Cal (calcite), Py (pyrite).



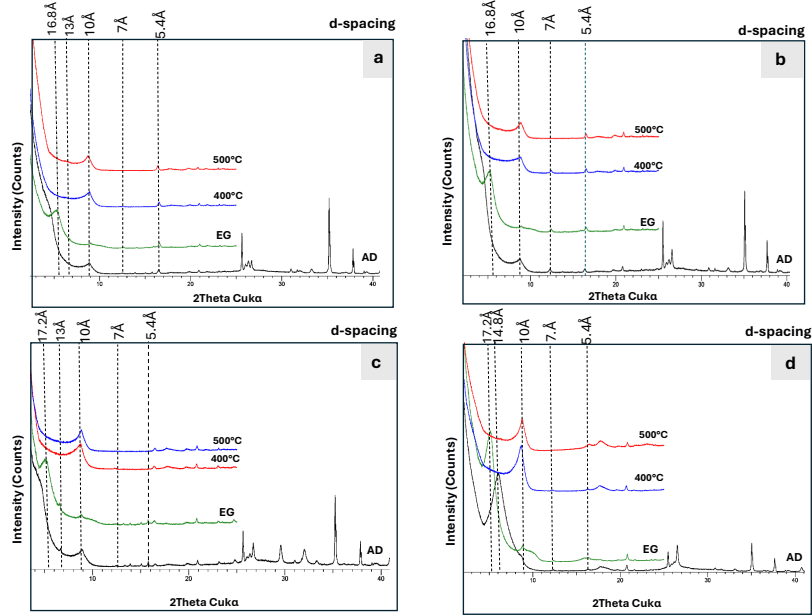

Figure 8: X-ray pattern diffractions of samples U1581B-66R-3W-107/115(Mud) (a), U1581B-69R-3W-62/76(Mud) (b), U1581B-71R-1W-63/76(Carb)(c) and U1581B-71R-1W-63/76(Mud) (d) after treatment air dried (AD), ethylene glycol (EG), heat treatment (400°C) and heat treatment (500°C)

Table 1: Numerical simulation setup for finite element model

| Parameter                  | Value                     | Description                               |
|----------------------------|---------------------------|-------------------------------------------|
| <b>Material Properties</b> |                           |                                           |
| $L$                        | 0.1 m                     | Model length                              |
| $\nu_0$                    | 0.25                      | Poisson's ratio                           |
| $E_0$                      | $10 \times 10^9$ Pa       | Young's modulus (background)              |
| $Y_s$                      | $5 \times 10^6$ Pa        | Cohesion (background)                     |
| $T_s$                      | $3 \times 10^6$ Pa        | Tensile failure stress                    |
| $\phi$                     | $\sin(25^\circ)$          | Friction angle                            |
| $\psi$                     | $\sin(8^\circ)$           | Dilation angle                            |
| <b>Boundary Conditions</b> |                           |                                           |
| $p_f$                      | $-1 \times 10^6$ Pa       | Fluid pressure                            |
| $P_c$                      | $1, 3, 10 \times 10^6$ Pa | Initial pressure boundary condition       |
| <b>Model Setup</b>         |                           |                                           |
| $\text{ampl}_{\text{rnd}}$ | 0.2                       | Relative amplitude of random perturbation |
| $n_{\text{node}}$          | [201, 201]                | Number of nodes in x and y directions     |
